# Supplementary material
Source: Elsevier journal article supplement (https://www.sciencedirect.com/science/article/pii/S0034935613003149)
Supplement: mmc1 [file S0034935613003149:mmc1.pdf]

La vía simpática cuya lesión produce el Síndrome de Claude-Bernard-Horner está formada por tres niveles neuronales:

- Neurona de primer orden, nivel central: Nace en el hipotálamo posterolateral desciende dorsolateralmente por el troncoencéfalo hasta el centro cilioespinal de Budge-Waller, primera sinapsis a nivel de la sustancia gris intermediolateral de la médula cervicotorácica (C8-T2).
- Neurona de segundo orden, preganglionar: Parte del centro de Budge-Waller, a través del plexo braquial pasa por el ápex pulmonar, el ganglio estrellado, cruza bajo la arteria subclavia y asciende por el cuello hasta el ganglio cervical superior (segunda sinapsis) en el ángulo de la mandíbula próximo a la bifurcación de la carótida común.
- Neurona de tercer orden, postganglionar: Sale del ganglio cervical superior y se separan sus componentes. Las fibras oftálmicas viajarán ligadas a la carótida interna. Las fibras faciales se relacionarán con la carótida externa.

Su etiología será desconocida en un alto porcentaje de los casos. Entre las causas descritas están la cirugía torácica o traumatológica, tumores, ictus, anomalías vasculares, costilla cervical, iatrogénicas e inflamatorias.
